# Supplementary material for: Evaluation of Vitrectomy with Planned Foveal Detachment as Surgical Treatment for Refractory Diabetic Macular Edema with or without Vitreomacular Interface Abnormality
Source: J Ophthalmol. 2018 May 7;2018:9246384. doi: 10.1155/2018/9246384 (PMC5964411; doi:10.1155/2018/9246384)
Supplement: Supplementary Material — Video 1: edited video showing the ILM peeling in a surgically naïve case with a refractory DME in spite of 9 IVB injections during the course of 1 year and 3 IV triamcinolone (TA) injections 3 months apart, BCVA measuring 0.1. Secondary iatrogenic macular hole occurred during submacular BSS injection. Fluid-air exchange at the end of the surgery. Video 2: edited video showing a case with fine EMM and refractory DME in spite of repeated ranibizumab injections and 3 aflibercept injections along the course of 8 months, the EMM that was peeled using an end-gripping 23-gauge forceps after staining with dual stain, subretinal injection of BSS was attempted as mentioned above. Fluid air exchange was then done. Video 3: edited movie for an eye with persistent DME despite previous vitrectomy, staining was also done under air to ensure ILM removal above the entire area involved in the edema process and proper peripheral vitreous trimming before attempting subretinal BSS injection was done. Air was left as a tamponade at the conclusion of surgery. [file 9246384.f1.zip]

Archive with 3 entries (3 files):
- 9246384.f1/mat.9246384.v2.mp4
- 9246384.f1/moh abdel fatah.mp4
- 9246384.f1/zahra tactional ME on air.mp4
